# Supplementary material for: Development of SCAR Markers for Genetic Authentication of Metarhizium acridum
Source: MDPI journal article supplement (doi:10.3390/jof10040269), 2024-04-04
Supplement: s1 [file s1]

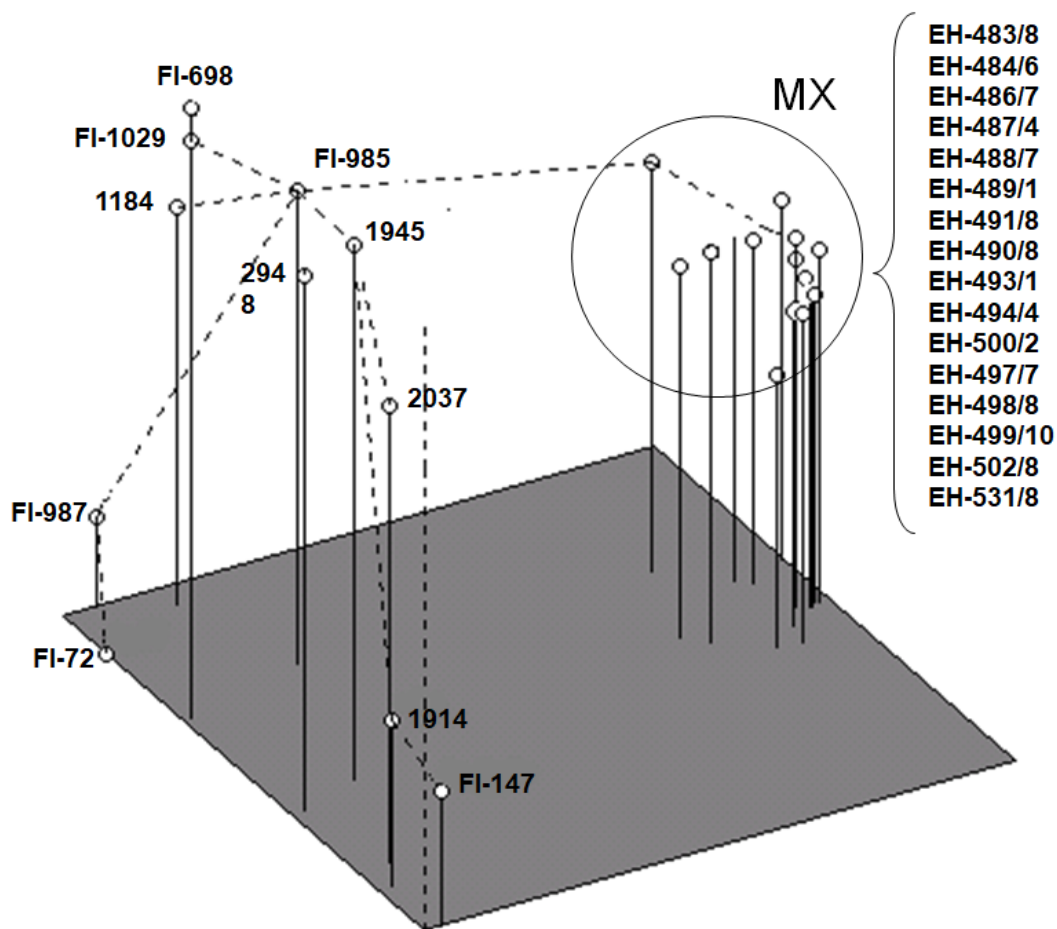

**Supplementary Figure S1.** Minimum spanning network (MST) and principal coordinates (PcoA) of *M. acridum* DNA. All isolates of MX form one group, directly related to reference strains FI-985 of *M. anisopliae* var. *Acridum* and 1184 of *M. flavoviride* var. *flavoviride*. Isolate/strain identification codes are given in Table 1.

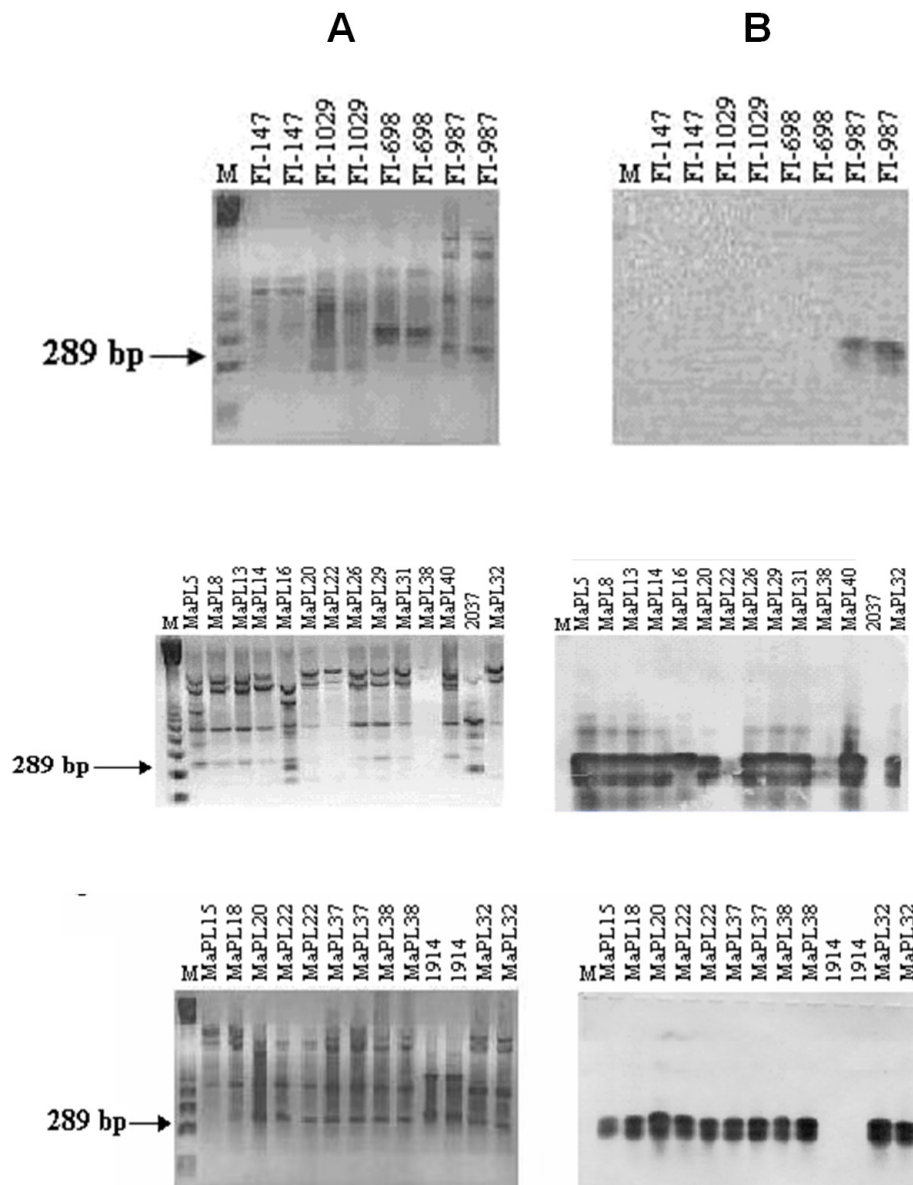

**Supplementary Figure S2.** Hybridization with the Ma-160<sub>OPA-05</sub> probe. A) The figures show the gels with the polymorphic patterns of the *M. acridum* cultures from MX and reference strains. B) The figures show the result of hybridization with the probe.

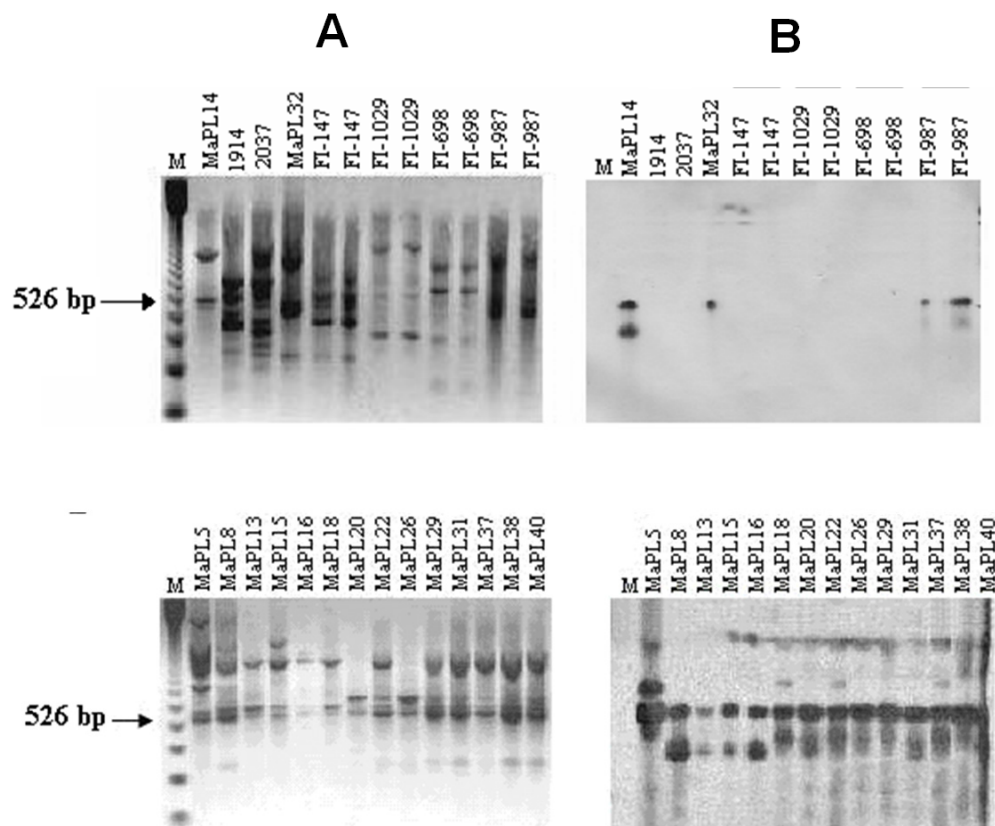

**Supplementary Figure S3.** Hybridization with the Ma-151<sub>OPA-04</sub> probe. A) The figures show the gels with the polymorphic patterns of the *M. acridum* cultures from MX and reference strains. B) The figures show the result of hybridization with the probe.

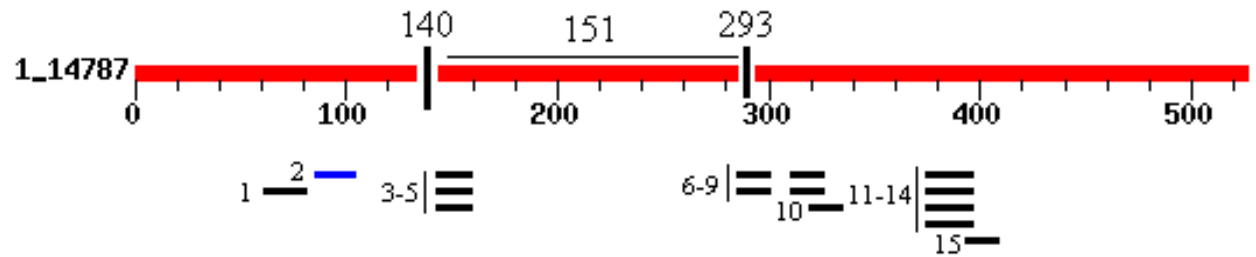

**Supplementary Figure S4.** Comparison of the clone sequence obtained Ma<sub>526</sub> with all the sequences registered in GenBank. Black lines indicate regions shared with other fungi: 1 and 15 *Gibberella zea*, 2 and 6-9 *Neurospora crassa*, 3-5 and 11-14 *Saccharomyces cerevisiae* and 10 *Fusarium tricinctum*. The vertical line with 151 indicates the region amplified by the specific oligonucleotides for *M. acridum*.

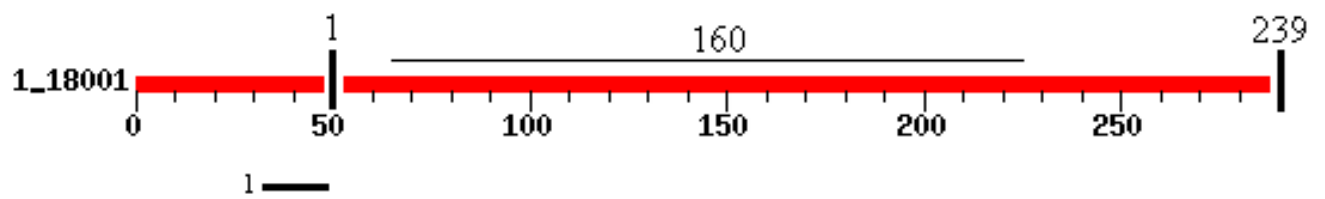

**Supplementary Figure S5.** Comparison of the clone sequence obtained Ma<sub>289</sub> with all the sequences registered in GenBank. The black line indicates the region shared with 1 *Ophiostoma picea*. The vertical line with the number 160 indicates the region amplified by the oligonucleotides specific for *M. acridum*.
